# Supplementary material for: Anion complexation of a pentafluorophenyl-substituted tripodal urea receptor in solution and the solid state: selectivity toward phosphate
Source: Royal Society of Chemistry journal article supplement (doi:10.1039/b820322a), 2009-01-01

## Supporting Information

### **Anion Complexation of Pentafluorophenyl-Substituted Tripodal Urea Receptor in solution and the Solid State: Selectivity toward Phosphate.**

**I. Ravikumar, P. S. Lakshminarayanan, M. Arunachalam, E. Suresh and Pradyut Ghosh\***

E-mail: [icpg@iacs.res.in](mailto:icpg@iacs.res.in)

Figure 1S:  $^1\text{H-NMR}$  spectra of  $\text{L}^2$  in  $\text{DMSO-d}_6$  at  $25^\circ\text{C}$

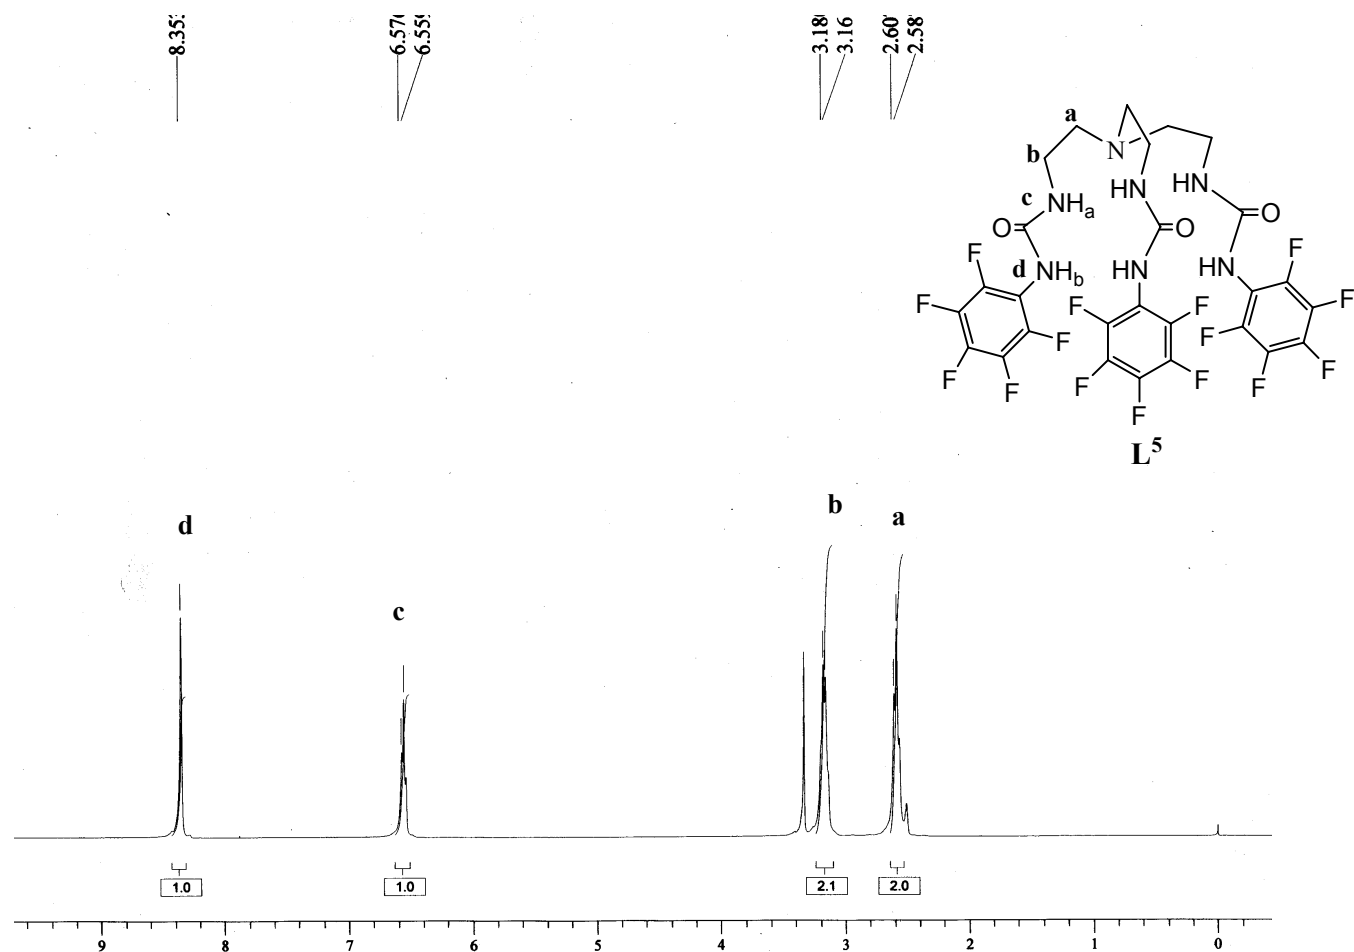



Figure 2S:  $^{13}\text{C}$ -NMR spectra of  $\text{L}^1$  in  $\text{DMSO-d}_6$  at  $25^\circ\text{C}$

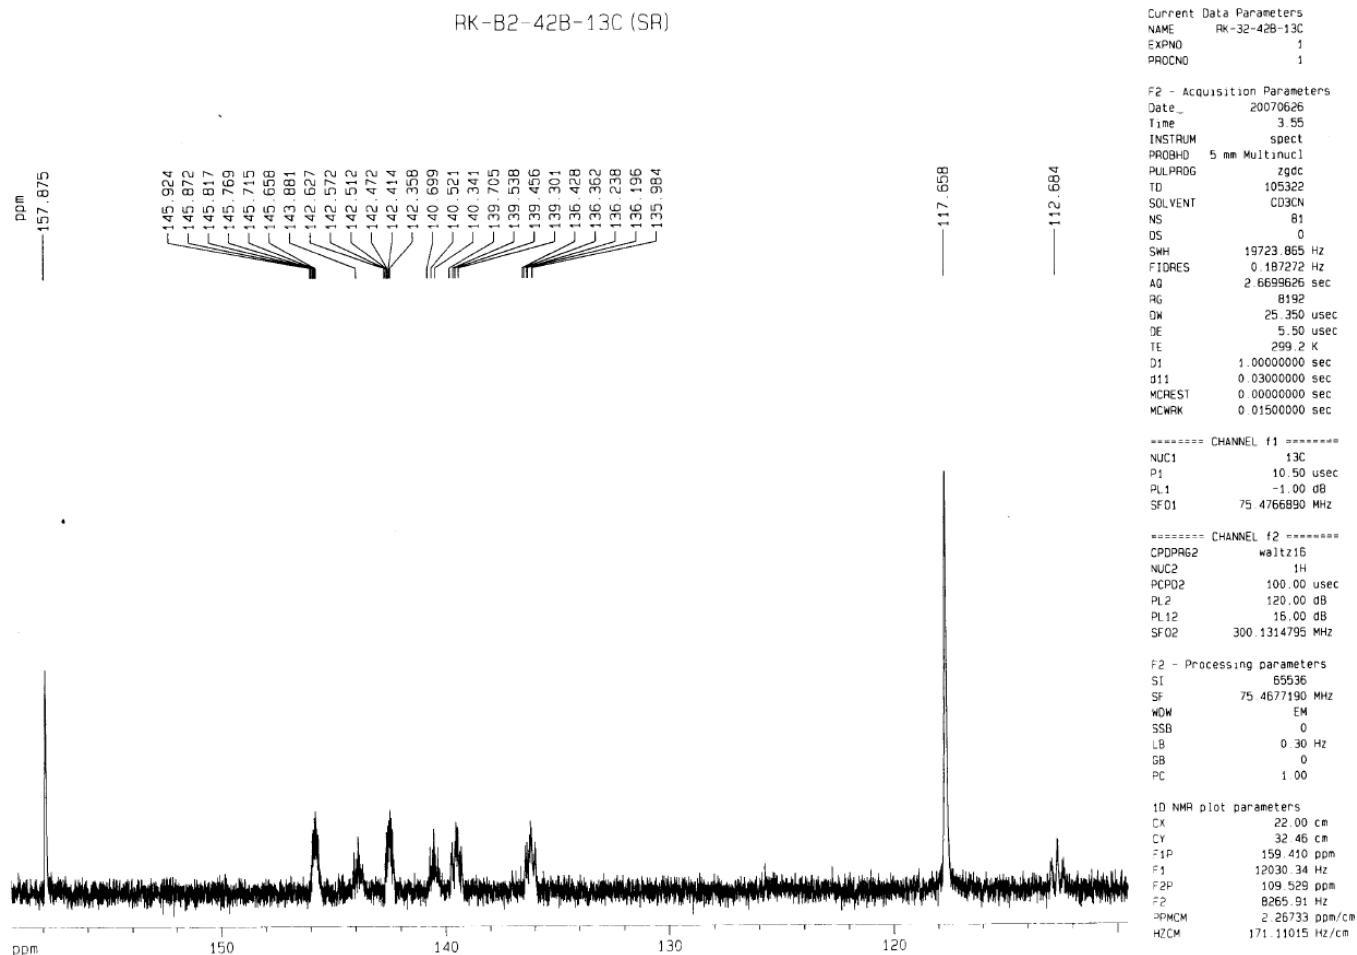

**Figure 3S** HRMS spectrum of **L<sup>1</sup>**

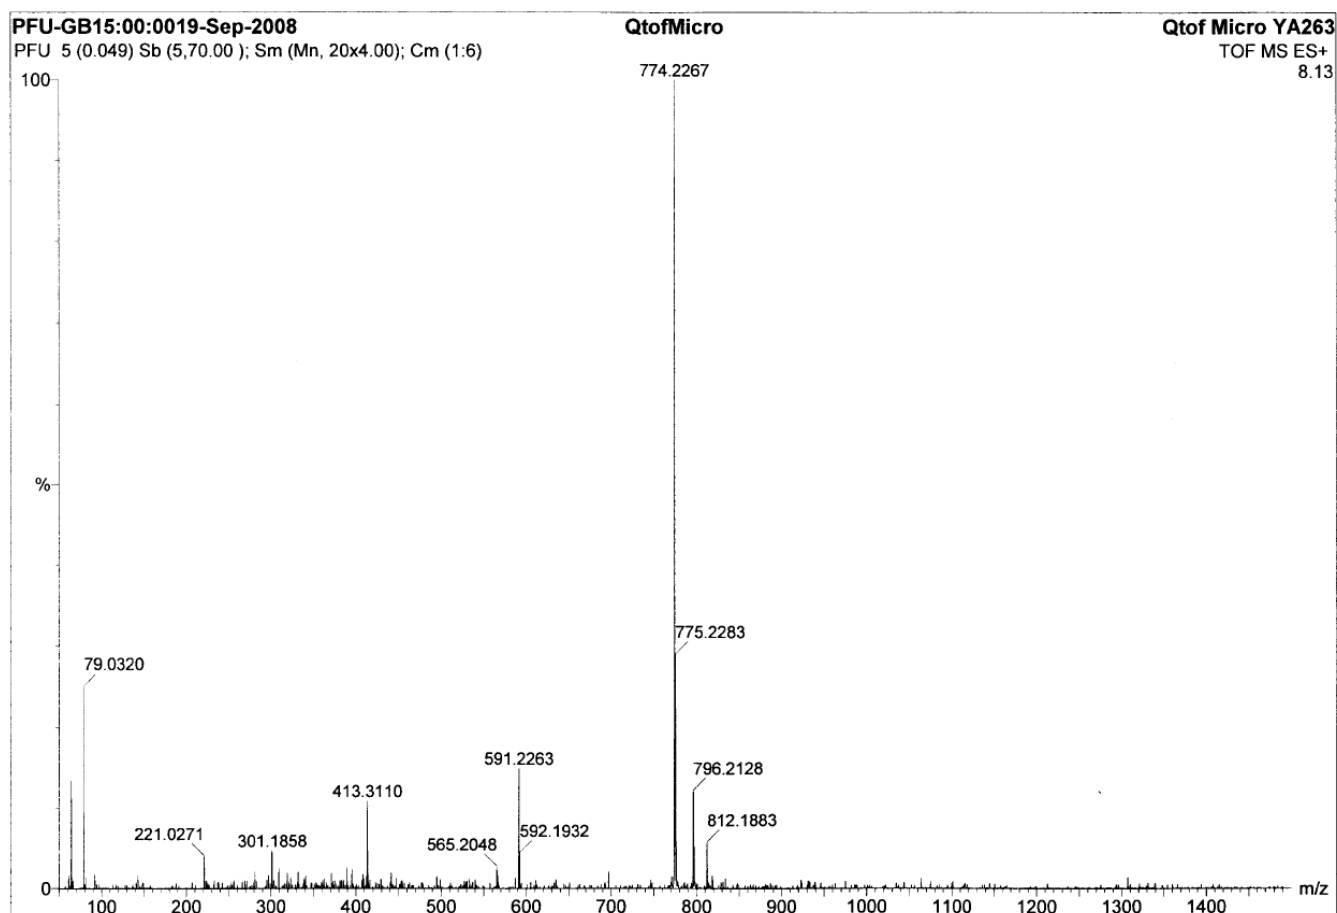

Figure 4S:  $^1\text{H-NMR}$  spectra of complex **1** in  $\text{DMSO-d}_6$  at  $25^\circ\text{C}$

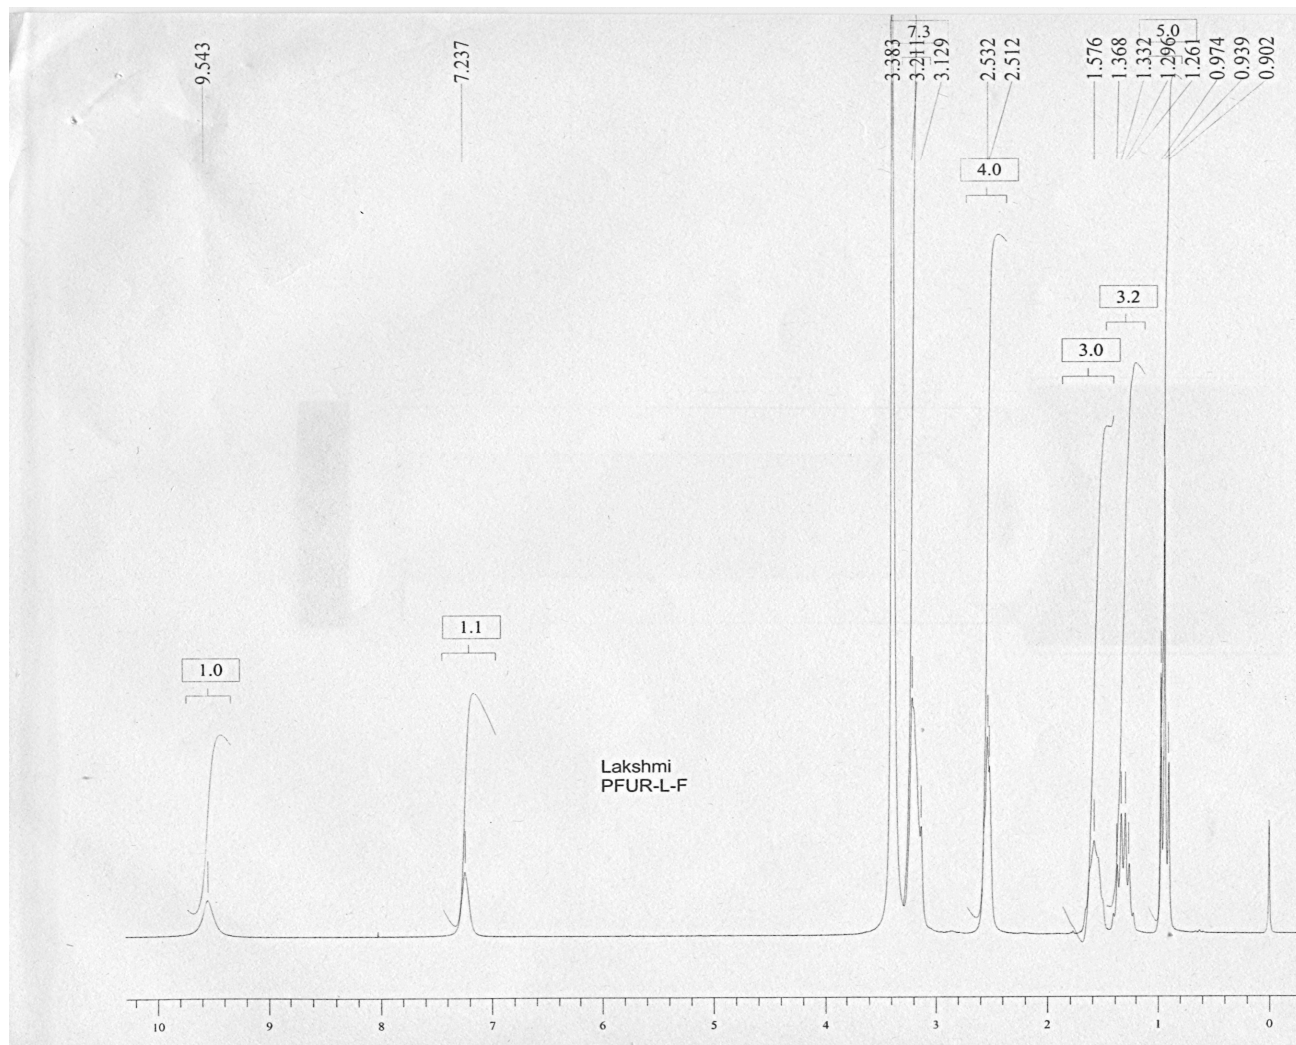

Figure 5S:  $^{13}\text{C}$ -NMR spectra of complex **1** in DMSO- $\text{d}_6$  at 25°C

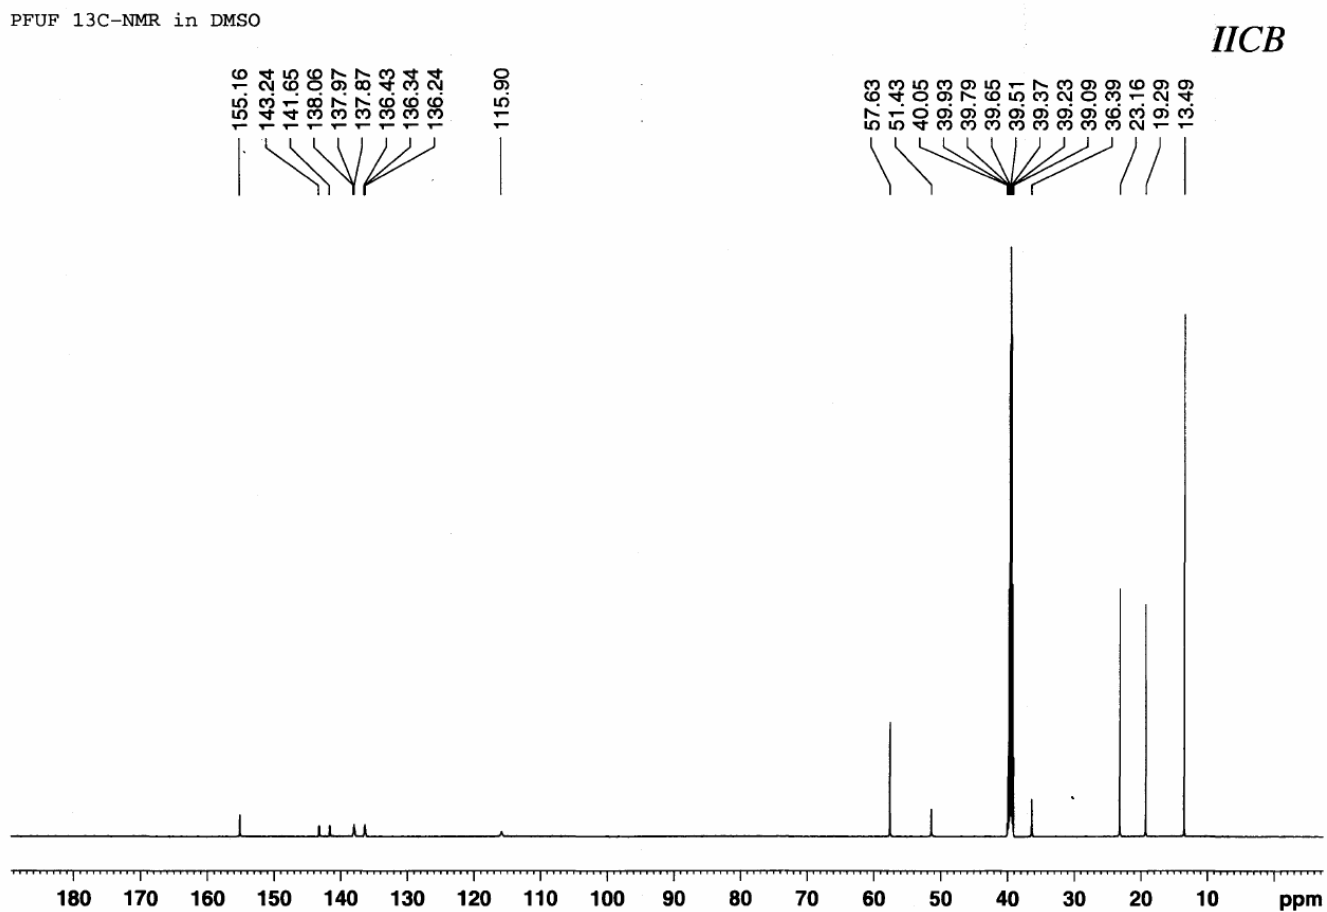

**Figure 6S** HRMS spectrum of complex **1**

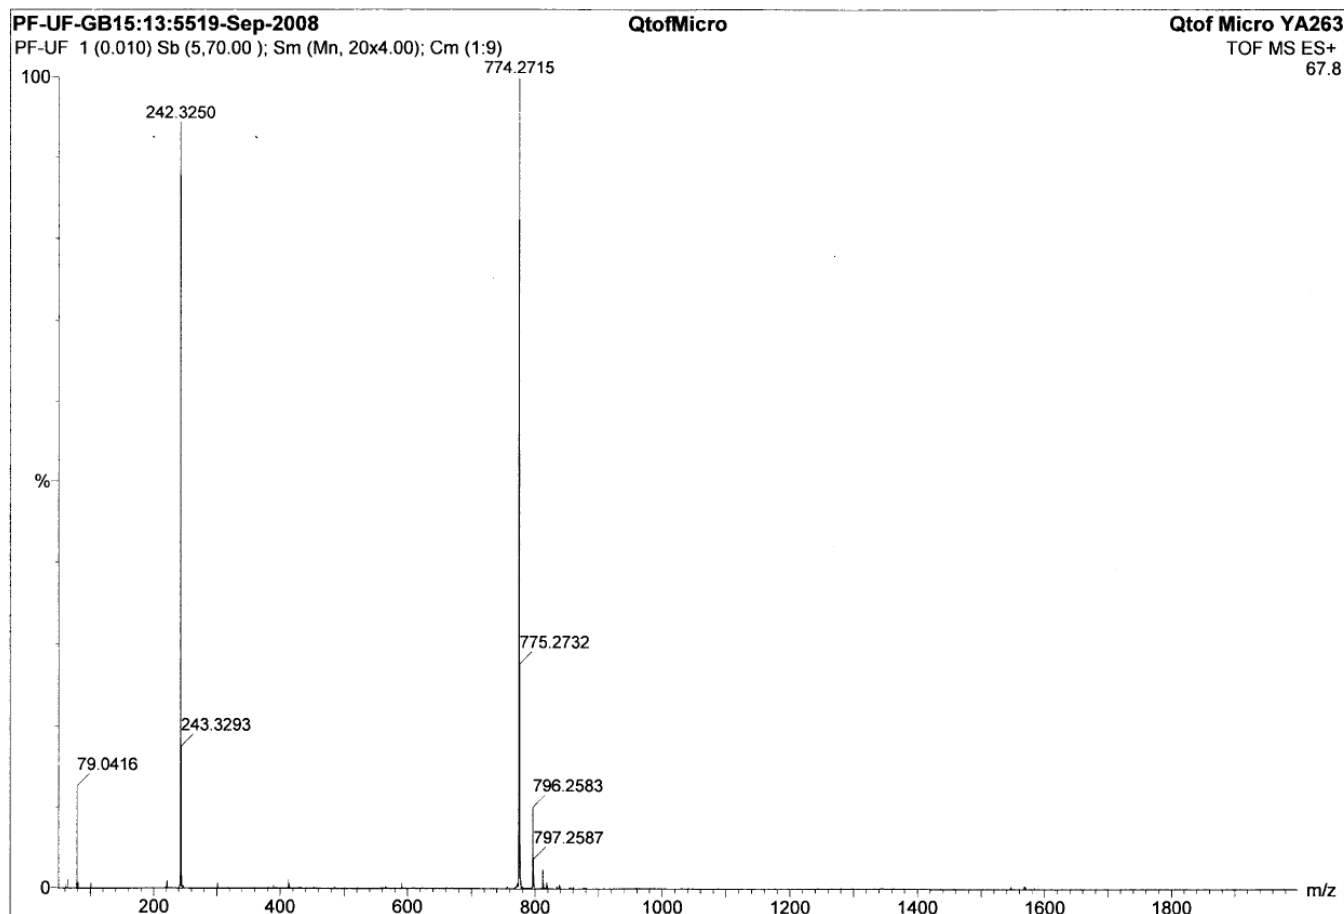



Figure 7S:  $^1\text{H-NMR}$  spectra of complex **2** in  $\text{DMSO-d}_6$  at  $25^\circ\text{C}$

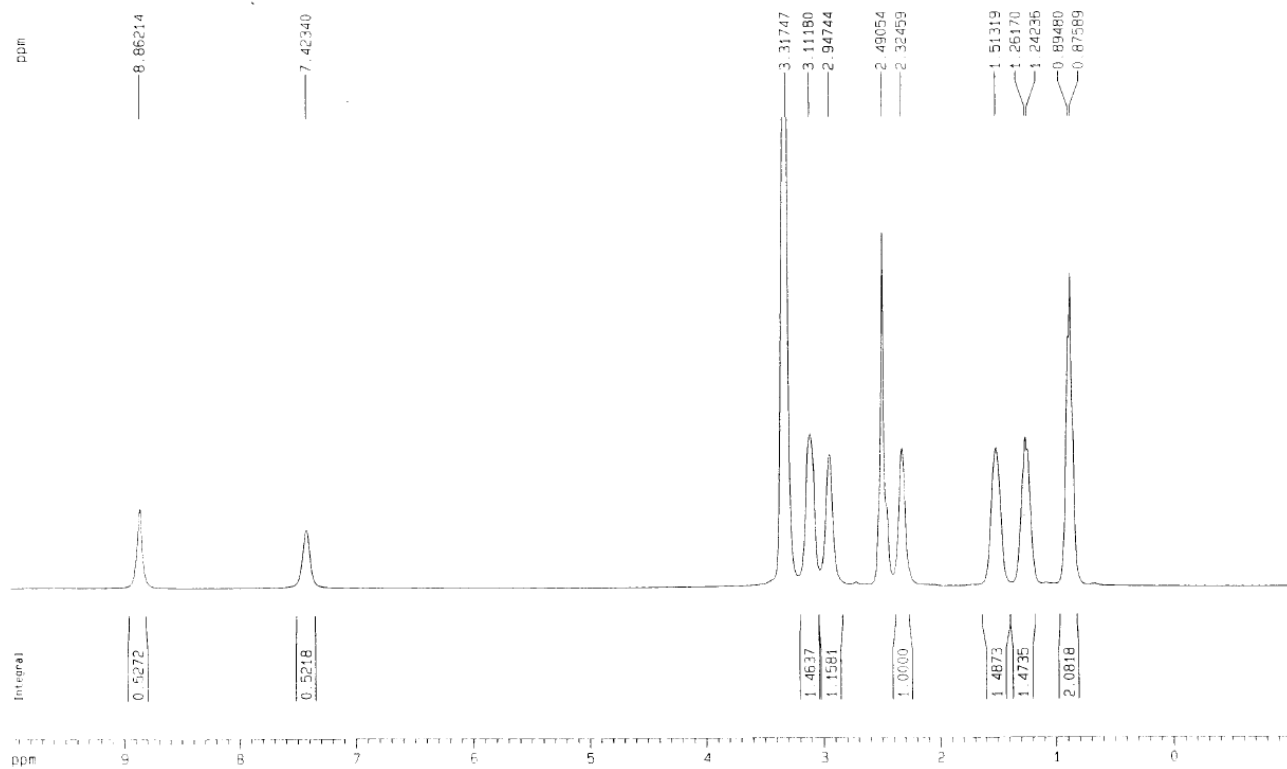

Figure 8S:  $^{13}\text{C}$ -NMR spectra of complex **2** in  $\text{DMSO-d}_6$  at  $25^\circ\text{C}$

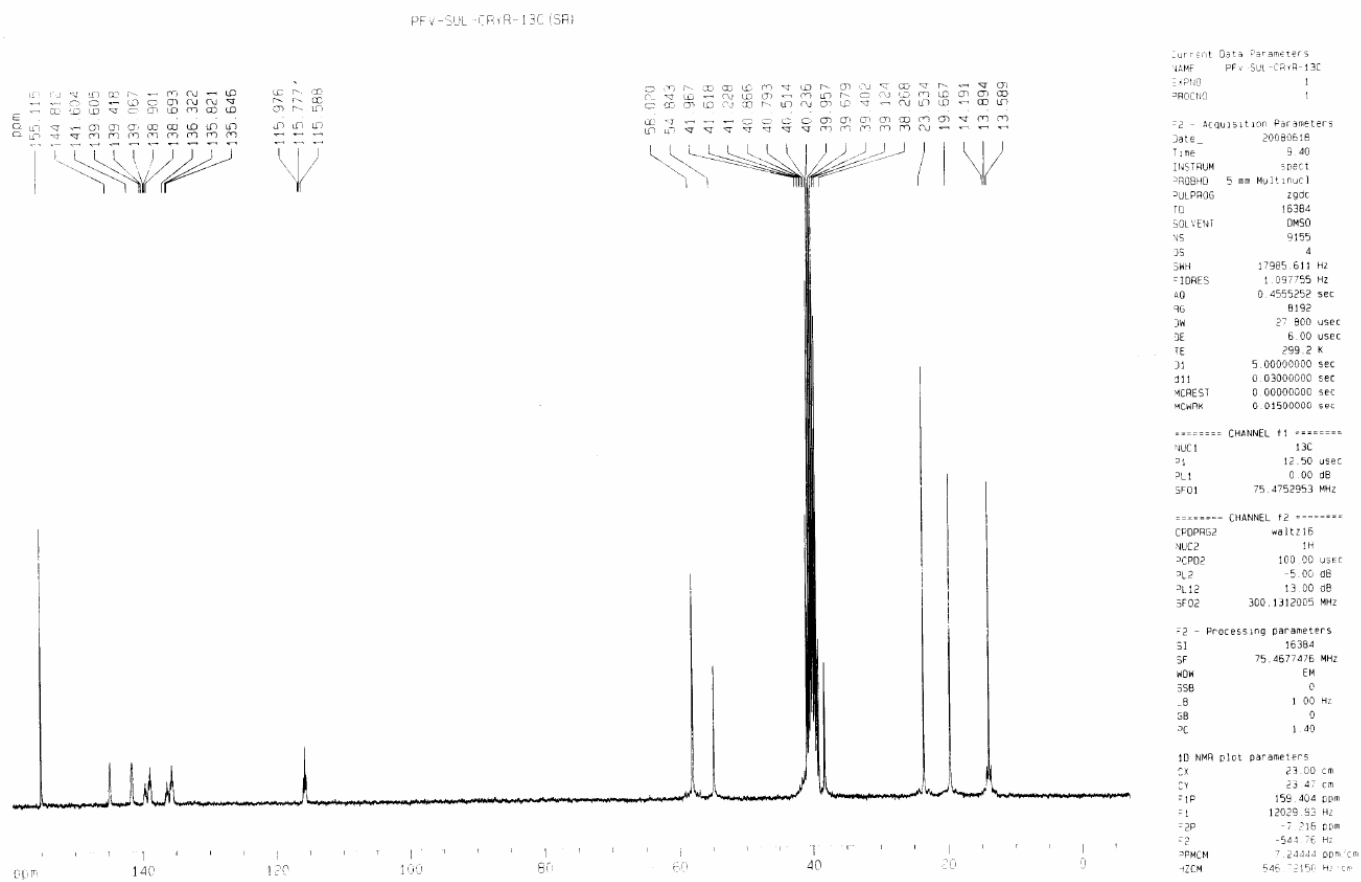

**Figure 9S** HRMS spectrum of complex **2**

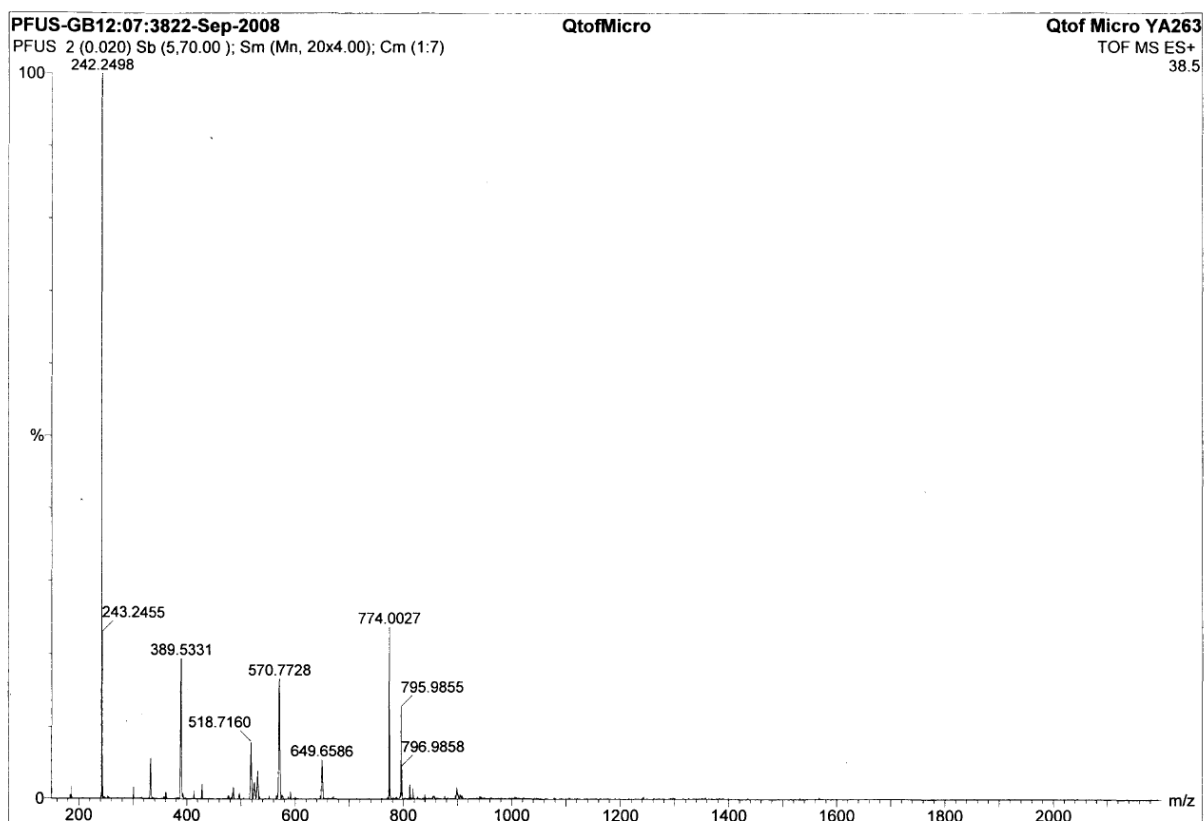

Figure 10S:  $^{19}\text{F}$ -NMR spectra of  $n\text{-Bu}_4\text{N}^+\text{F}^-$  in  $\text{DMSO-d}_6$  at  $25^\circ\text{C}$ .

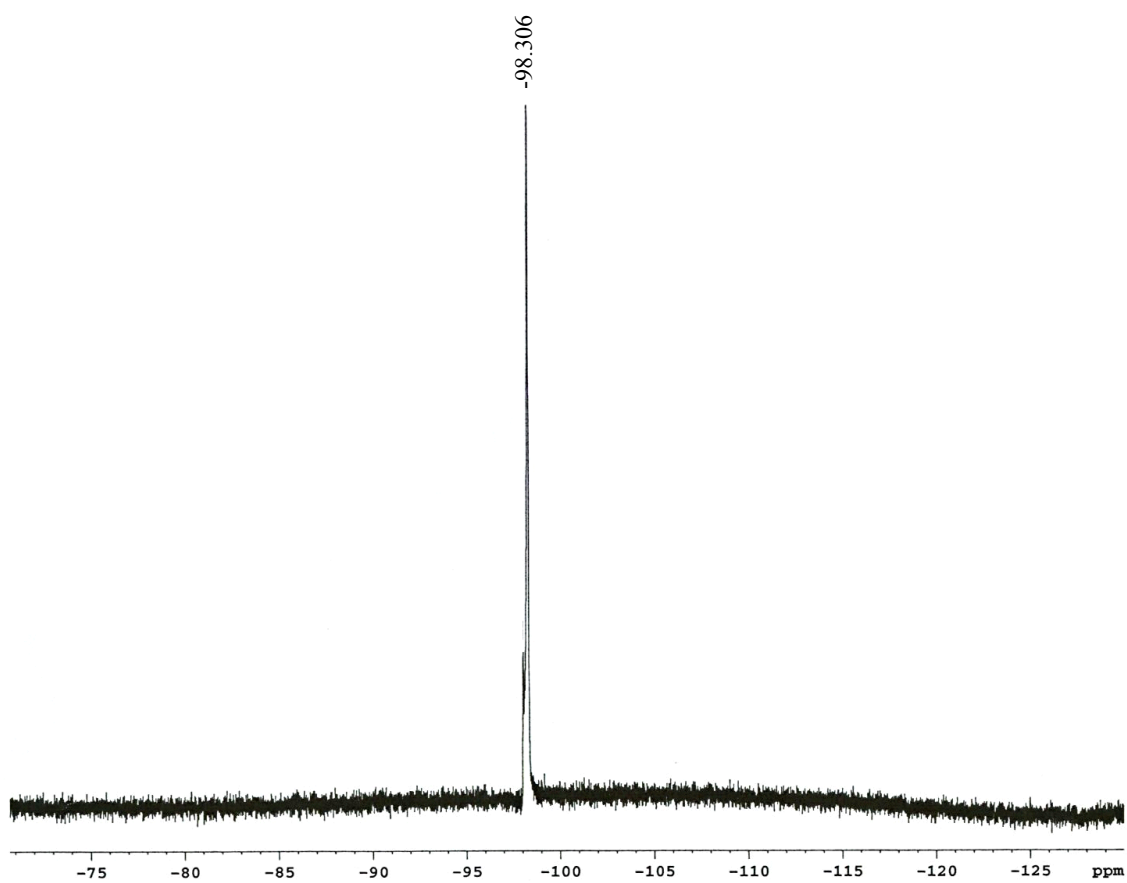

Figure 11S:  $^{19}\text{F}$ -NMR spectra of  $\text{L}^1$  in  $\text{DMSO-d}_6$  at  $25^\circ\text{C}$ .

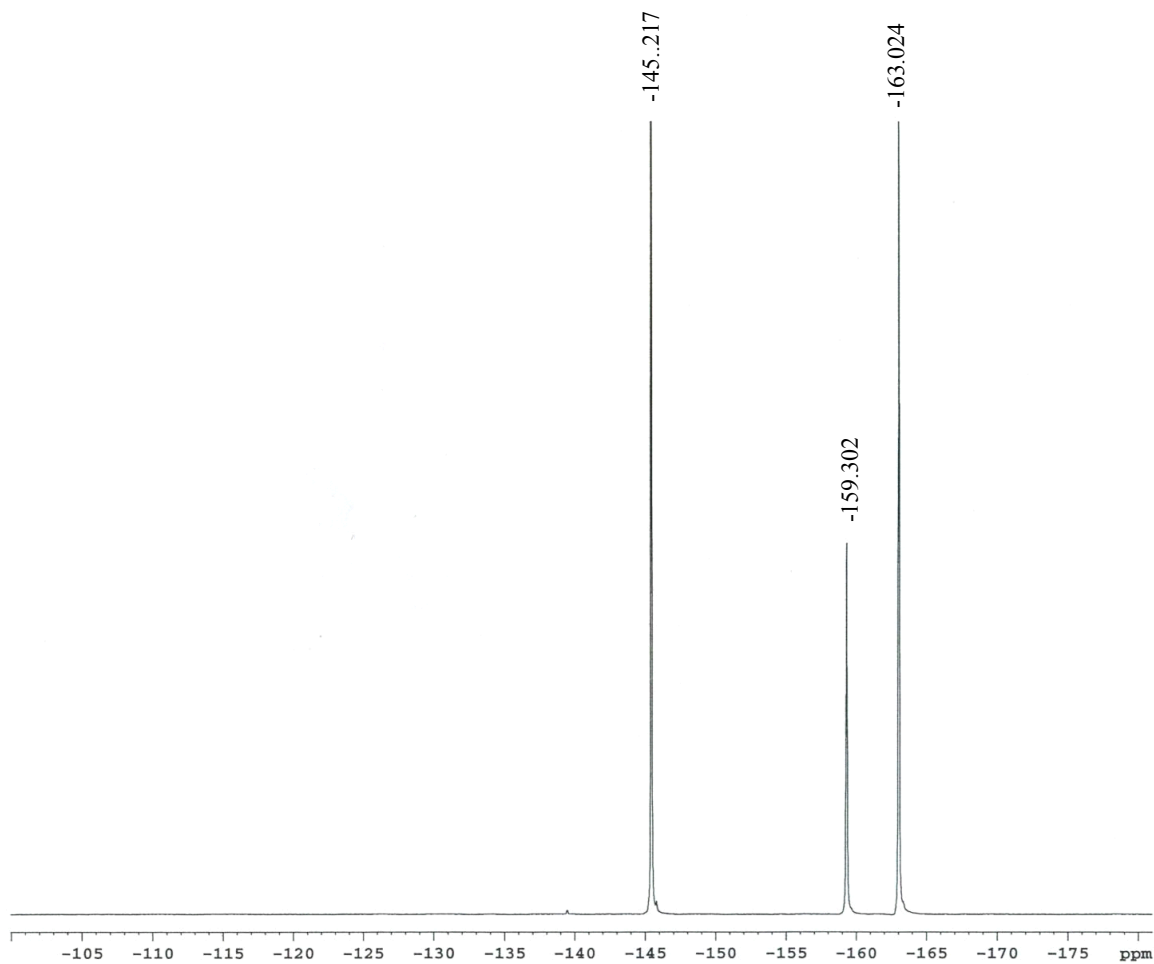

Figure 12S:  $^{19}\text{F}$ -NMR spectra of  $n\text{-Bu}_4\text{N}^+\text{F}^-$  with  $\text{L}^1$  in  $\text{DMSO-d}_6$  at  $25^\circ\text{C}$

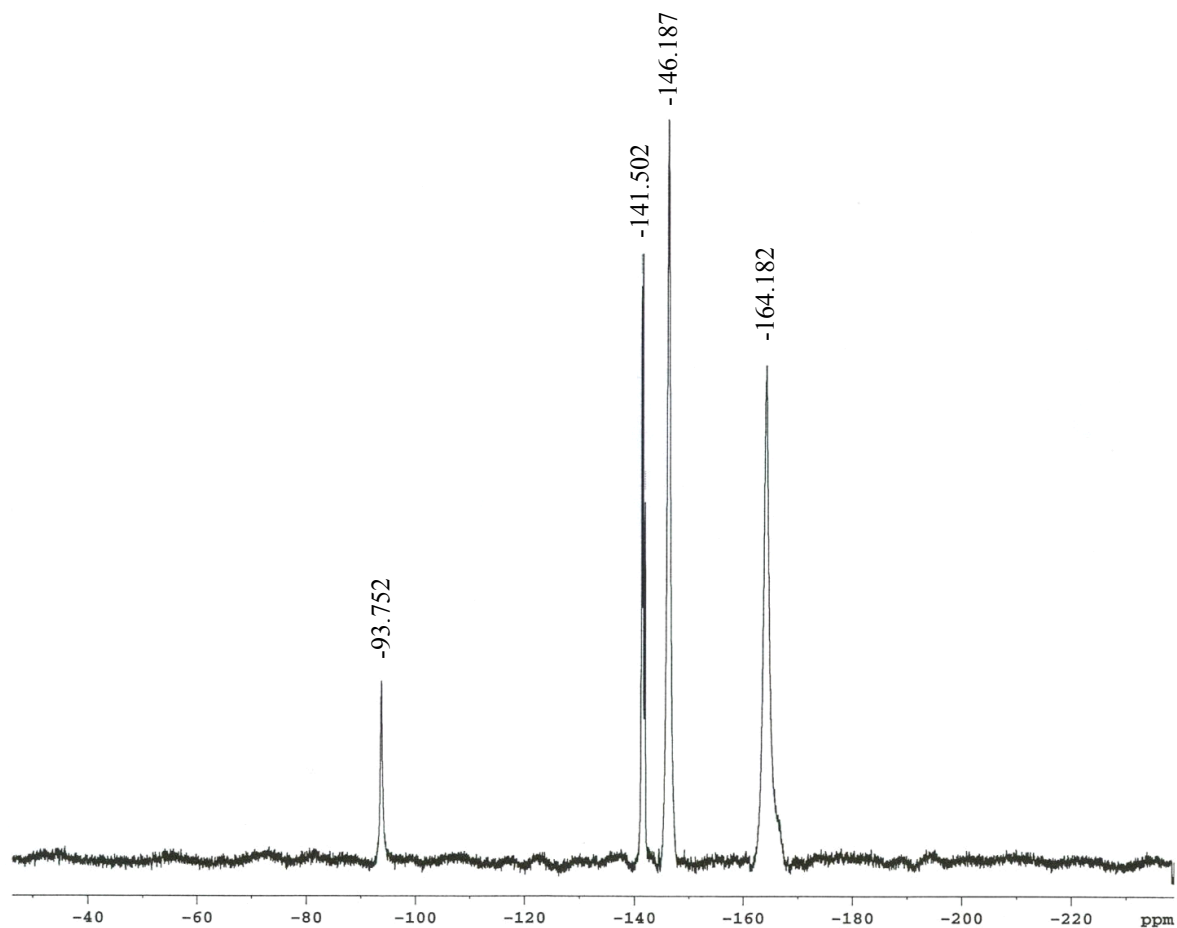

Figure 13S: Change in Chemical shifts for  $L^1$  with  $(n\text{-Bu}_4\text{N}^+)\text{HSO}_4^-$  in  $\text{DMSO-d}_6$  at  $25^\circ\text{C}$ .

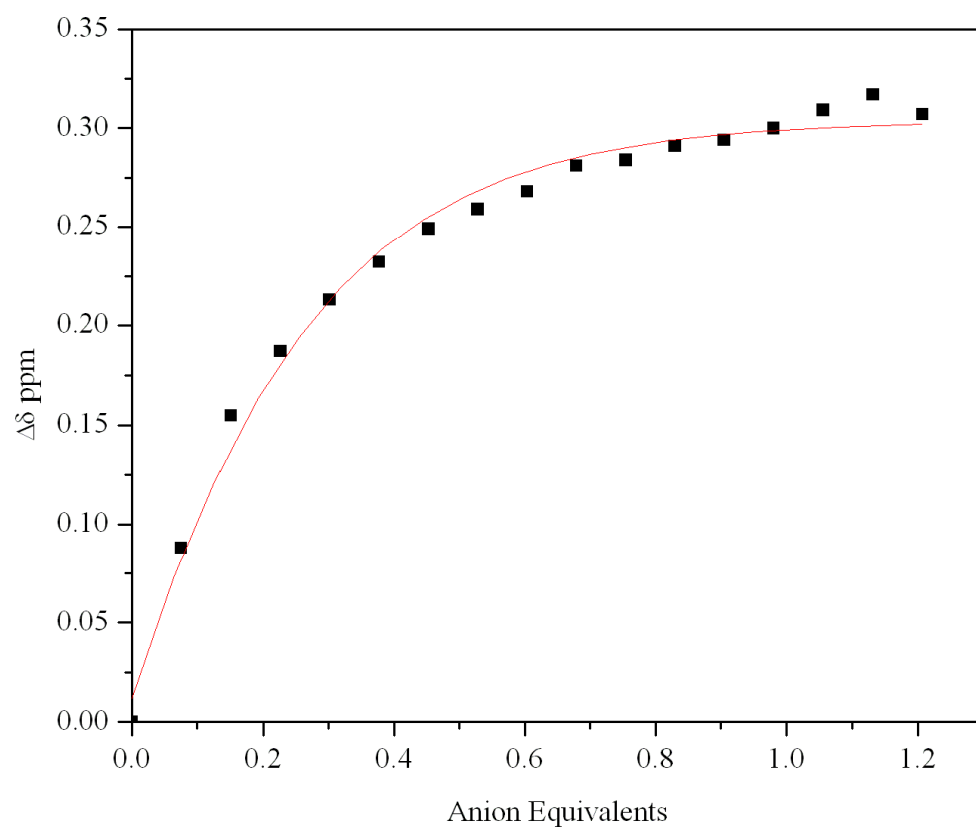

Figure 14S: Job's plot for  $L^1$  with  $(n\text{-Bu}_4\text{N}^+)_2\text{SO}_4^{2-}$  in  $\text{DMSO-d}_6$  at  $25^\circ\text{C}$ .

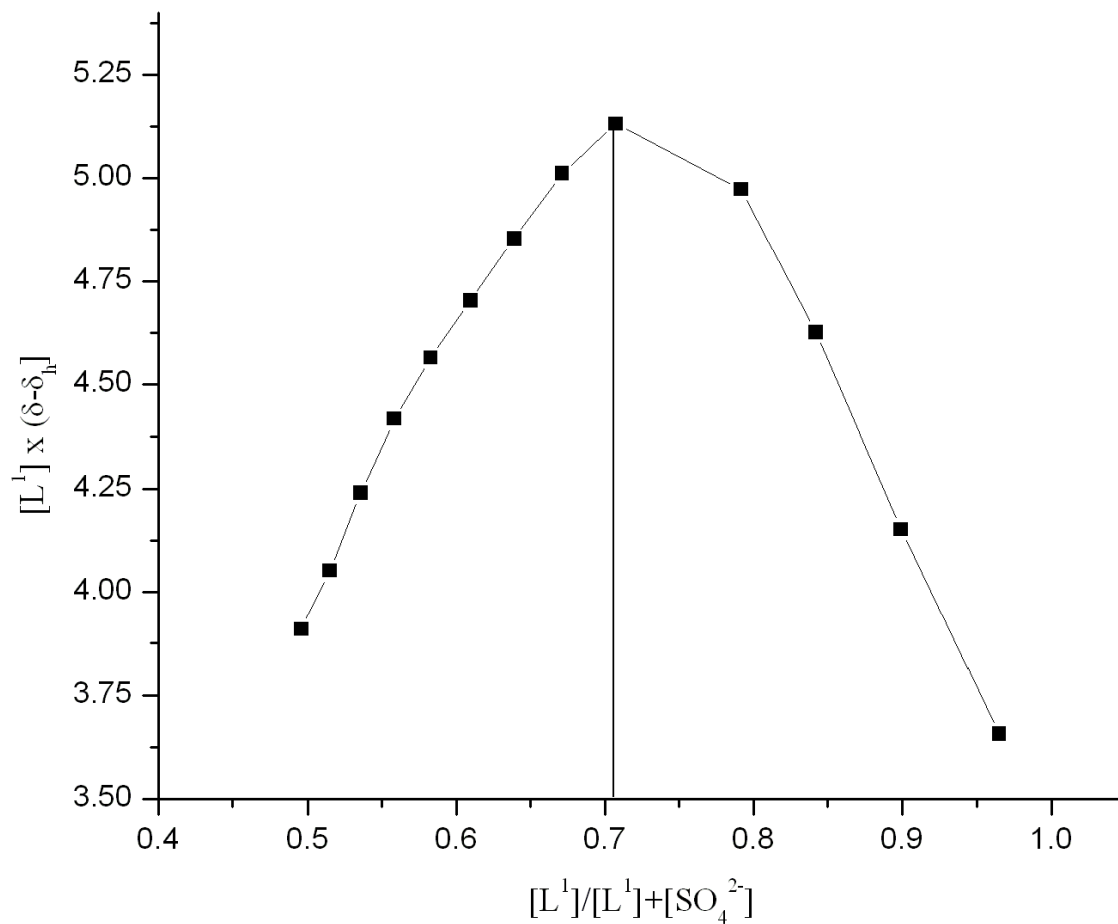



Figure 15S: Job's plot for  $L^1$  with  $(n\text{-Bu}_4\text{N}^+)\text{HSO}_4^-$  in  $\text{DMSO-d}_6$  at  $25^\circ\text{C}$ .

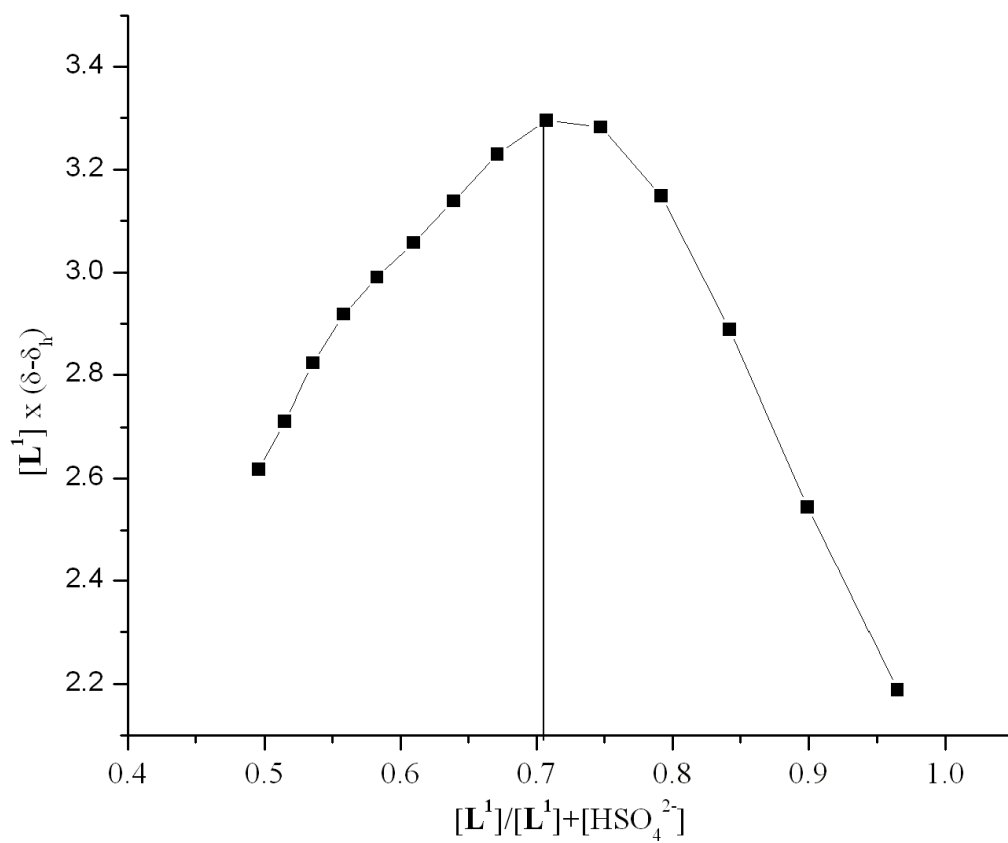

Figure 16S: The scatterplot of N-H...O angle vs. H...O distance of the hydrogen bonds in  $\text{H}_2\text{PO}_4^-$  complex.

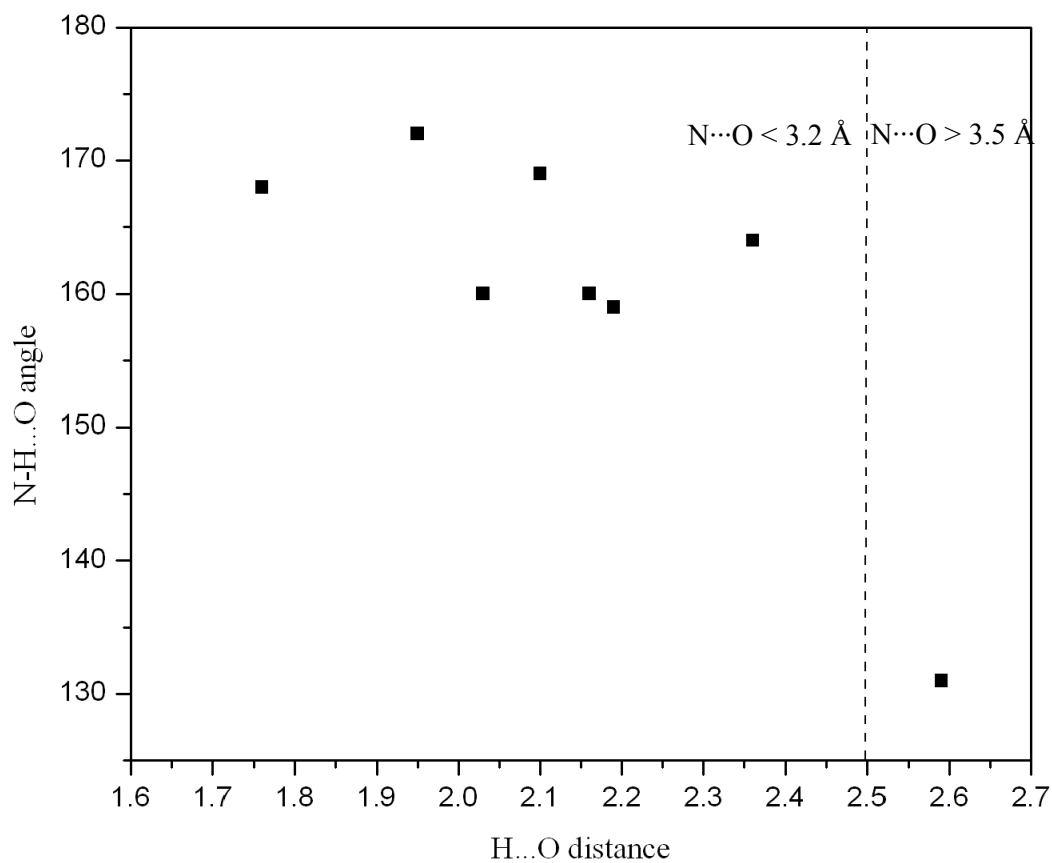

Figure 17S: ORTEP diagram of Complex 1 with 50% probability factor for the thermal ellipsoids.

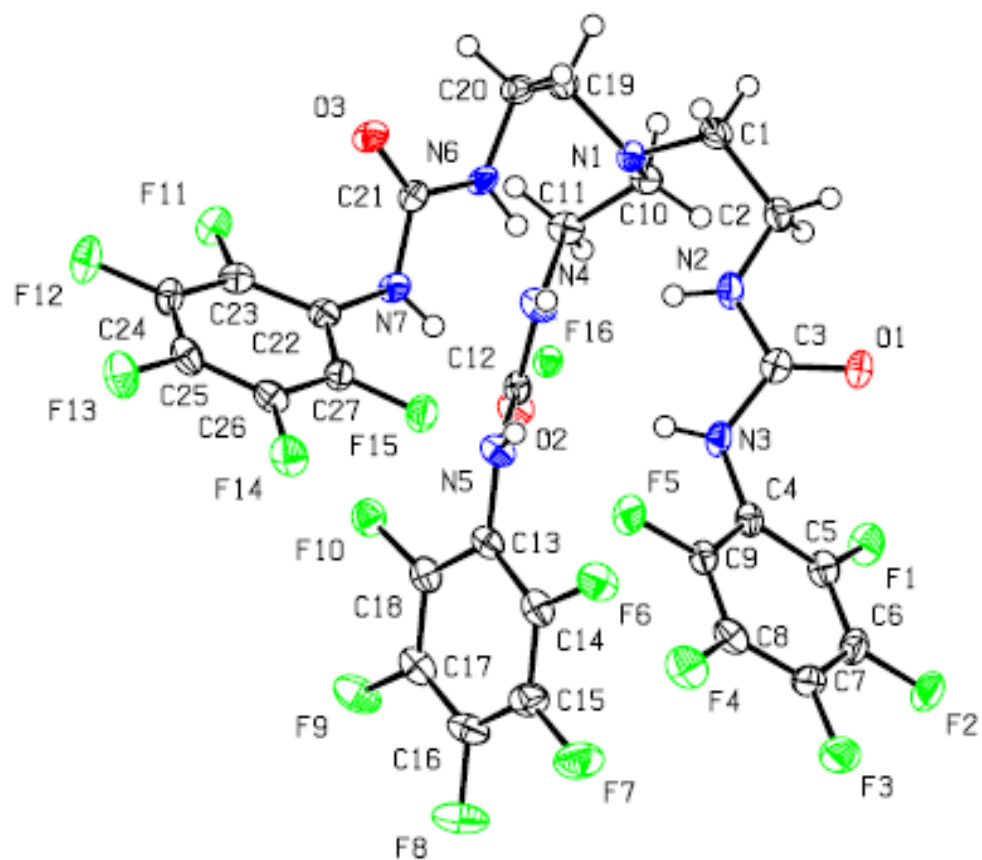

Figure 18S: The scatter plot of N-H...F angle vs. H...F distance of the hydrogen bonds in complex **1**.

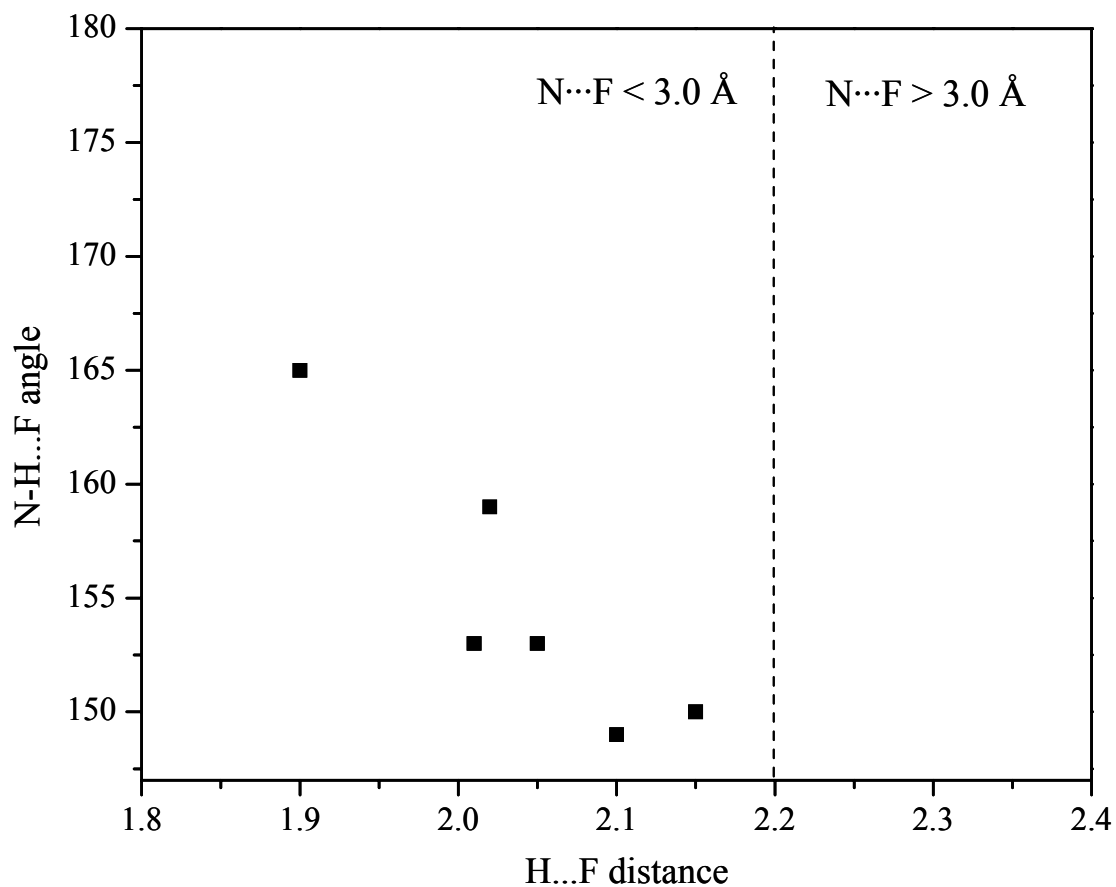

Figure 19S: Job's plot for  $L^1$  with  $n\text{-Bu}_4\text{N}^+\text{F}^-$  in  $\text{DMSO-d}_6$  at  $25^\circ\text{C}$ .

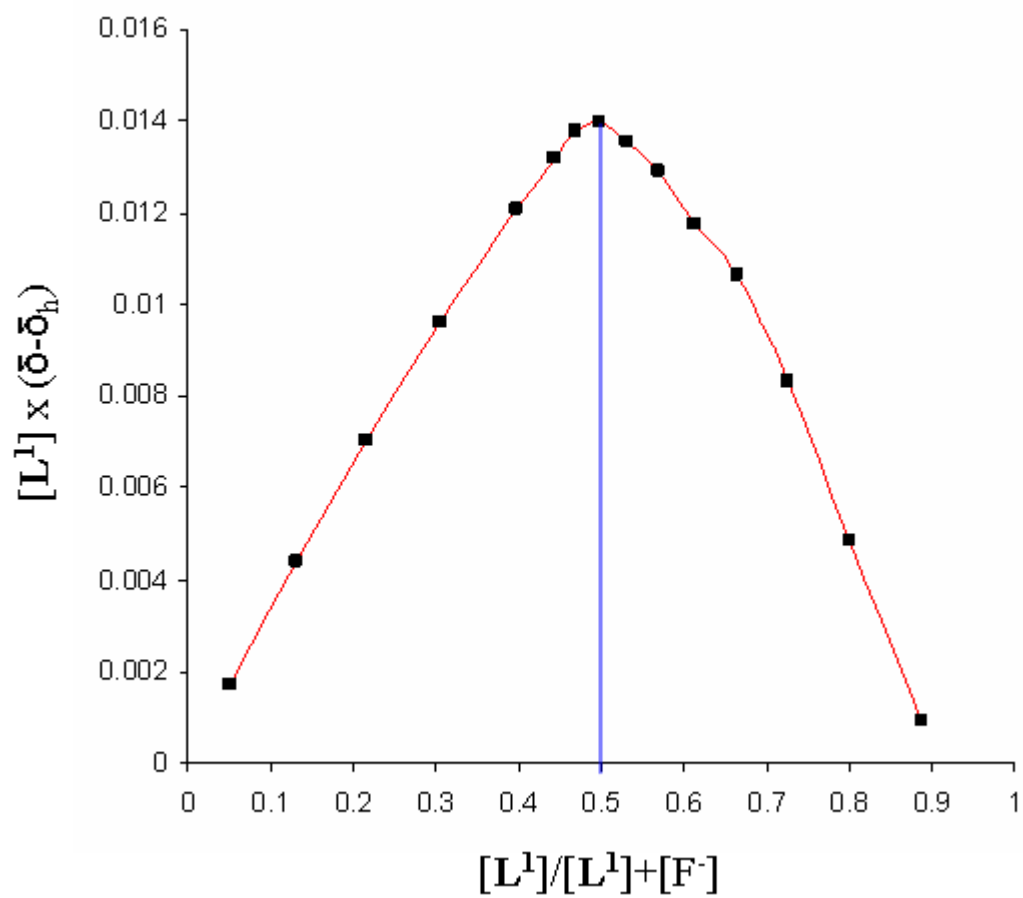

Figure 20S: Job's plot for  $L^1$  with  $n\text{-Bu}_4\text{N}^+\text{Cl}^-$  in  $\text{DMSO-d}_6$  at  $25^\circ\text{C}$ .

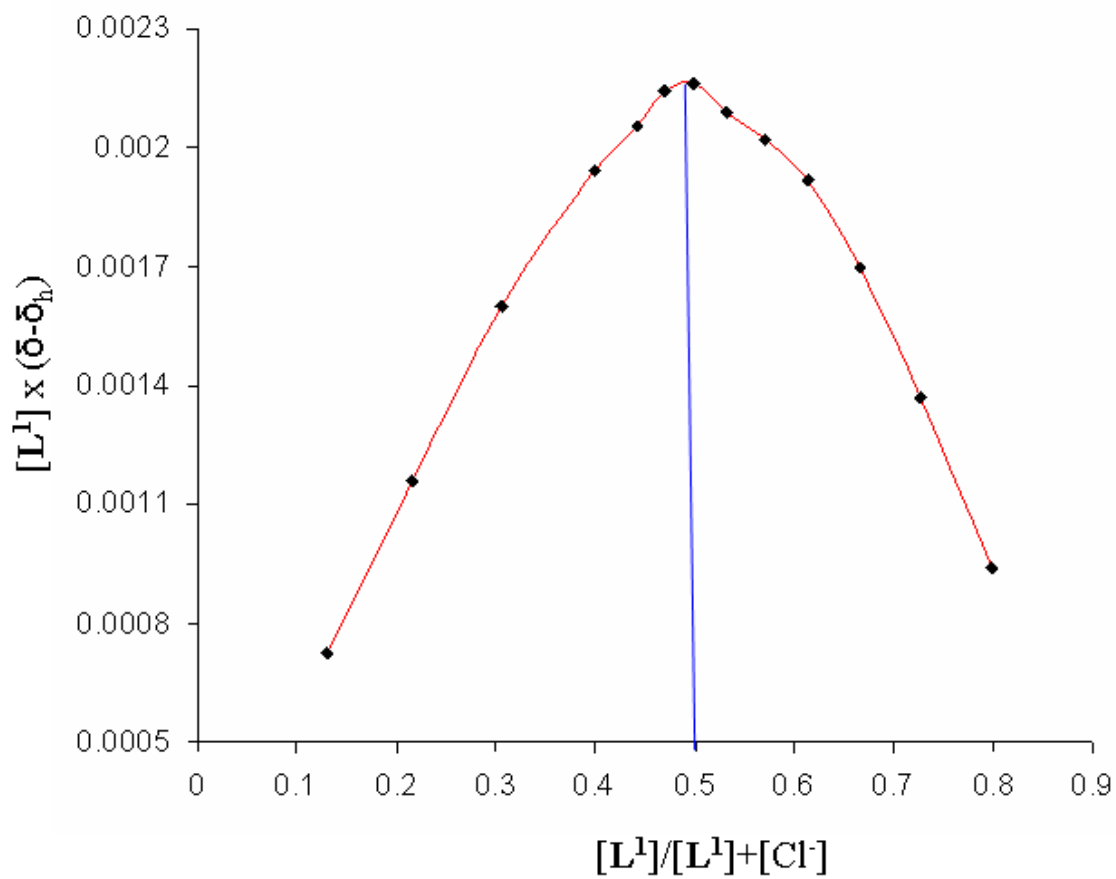

Figure 21S: Job's plot for  $L^1$  with  $n\text{-Bu}_4\text{N}^+\text{Br}^-$  in  $\text{DMSO-d}_6$  at  $25^\circ\text{C}$ .

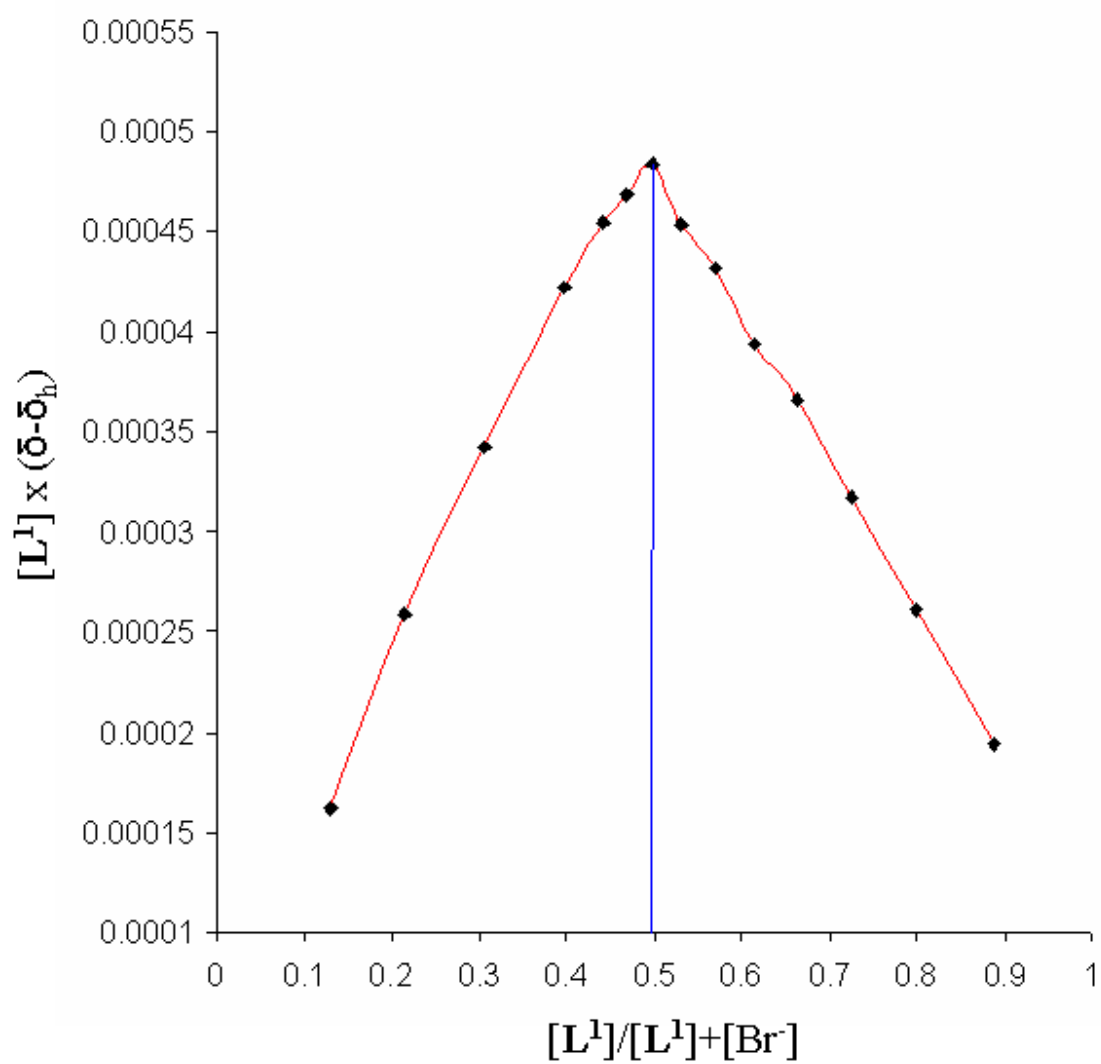

Figure 22S. Packing diagram of Complex 1 along b-axis.

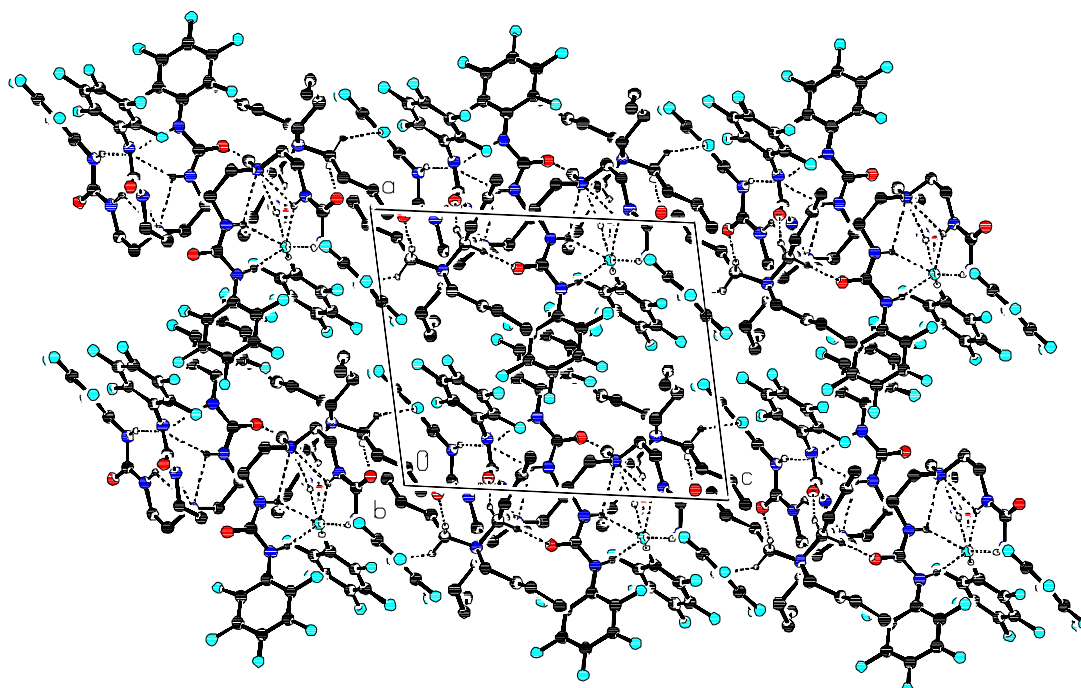



Figure 23S: ORTEP diagram of Complex **2** with 50% probability factor for the thermal ellipsoids.

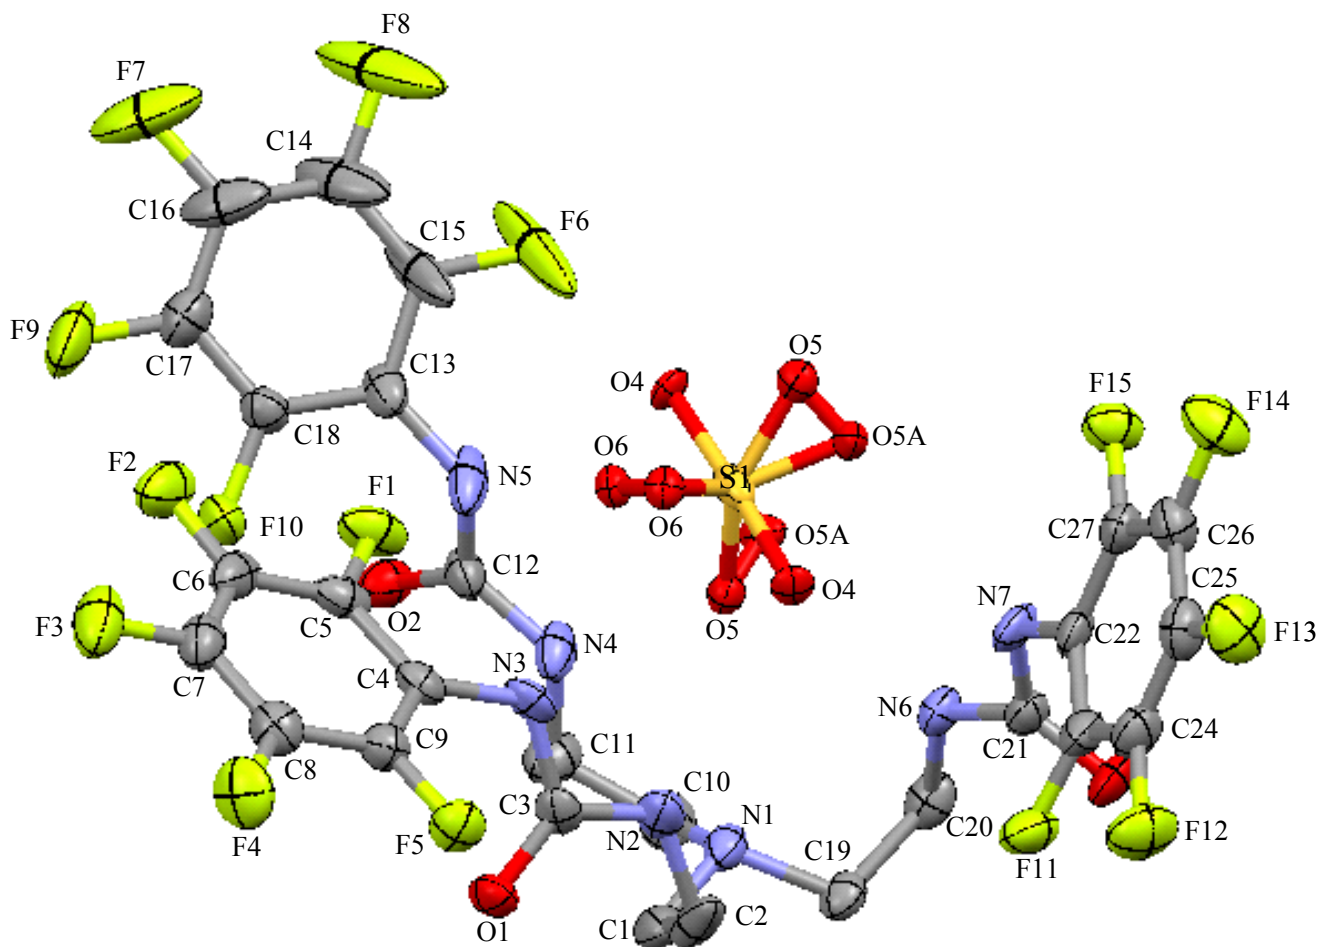

Supplement: b820322a.pdf [file b820322a.pdf]
